# Supplementary material
Source: PubMed Central journal article supplement (PMC3163731)
Supplement: NIHMS311979-supplement-1.pdf [file NIHMS311979-supplement-1.pdf]

## Supplementary Information

### Exome sequencing identifies *ACSF3* as the cause of Combined Malonic and Methylmalonic Aciduria

Jennifer L. Sloan<sup>1\*</sup>, Jennifer J. Johnston<sup>2\*</sup>, Irimi Manoli<sup>1&</sup>, Randy J. Chandler<sup>1,3&</sup>, Caitlin Krause<sup>2</sup>, Nuria Carrillo-Carrasco<sup>1</sup>, Suma D. Chandrasekaran<sup>1</sup>, Justin R. Sysol<sup>1</sup>, Kevin O'Brien<sup>4</sup>, Natalie S. Hauser<sup>1</sup>, Julie C. Sapp<sup>2</sup>, Heidi M. Dorward<sup>4</sup>, Marjan Huizing<sup>4</sup>, NIH Intramural Sequencing Center Group<sup>5</sup>, Bruce A. Barshop<sup>6</sup>, Susan A. Berry<sup>7</sup>, Philip M. James<sup>8</sup>, Neena L. Champaigne<sup>9</sup>, Pascale de Lonlay<sup>10</sup>, Vassilli Valayannopoulos<sup>10</sup>, Michael D. Geschwind<sup>11</sup>, Dimitar K. Gavrilov<sup>12</sup>, William L. Nyhan<sup>6</sup>, Leslie G. Biesecker<sup>2#</sup>, and Charles P. Venditti<sup>1</sup>

\*,& These authors contributed equally to this work

1 Genetics and Molecular Biology Branch, National Human Genome Research Institute, National Institutes of Health, Bethesda, MD, USA

2 Genetic Disease Research Branch, National Human Genome Research Institute, National Institutes of Health, Bethesda, MD, USA

3 Department of Pharmacology, Institute for Biomedical Sciences, The George Washington University, Washington, DC

4 Medical Genetics Branch, National Human Genome Research Institute, National Institutes of Health, Bethesda, MD USA

5 National Institutes of Health Intramural Sequencing Center, National Institutes of Health, Rockville, MD, USA

6 Department of Pediatrics, Biochemical Genetics Laboratory, University of California, San Diego, La Jolla, CA, USA

7 Department of Pediatrics, University of Minnesota, Minneapolis, MN, USA

8 Department of Pediatrics, Harvard Medical School, Children's Hospital Boston, Boston, MA, USA

9 Greenwood Genetics Center, Greenwood, SC USA

10 Reference Center for Inherited Metabolic Disorders and Necker-Enfants Malades Hospital, 149, Rue de Sèvres, 75015 Paris, France

11 Department of Neurology, University of California, San Francisco, San Francisco, CA USA

12 Department of Laboratory Medicine and Pathology, Mayo Clinic, Rochester, MN

Correspondence should be addressed to L.G.B. ([leslieb@helix.nih.gov](mailto:leslieb@helix.nih.gov)).

#Corresponding Author:

Leslie G. Biesecker, MD

Genetic Disease Research Branch

National Human Genome Research Institute

National Institutes of Health

49 Convent Drive Room 4A56

Bethesda, MD 20892-4472



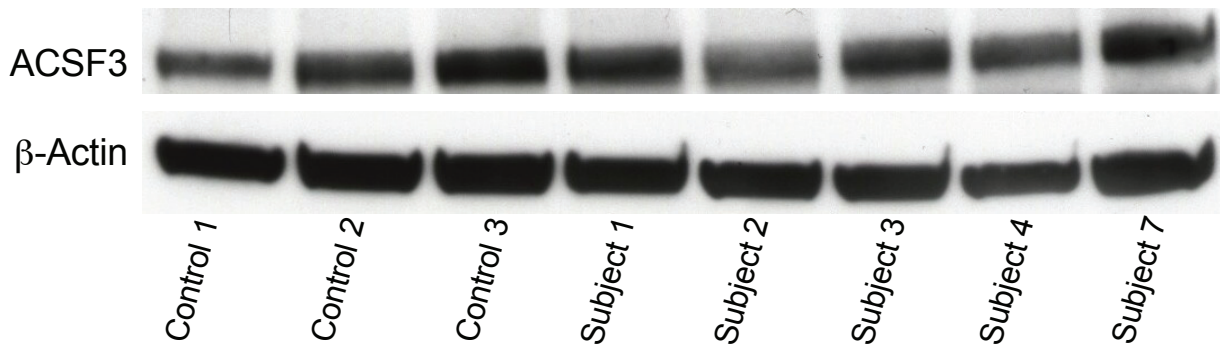

**Supplementary Figure 2. ACSF3 Western Blot Analysis.** Fibroblast extracts from three control and five patient cell lines were used for immunoblotting with a rabbit polyclonal anti-ACSF3 antibody. A mouse monoclonal anti- $\beta$  actin antibody was used as a loading control. The Western blot shows that all of the subjects had immunoreactive ACSF3.

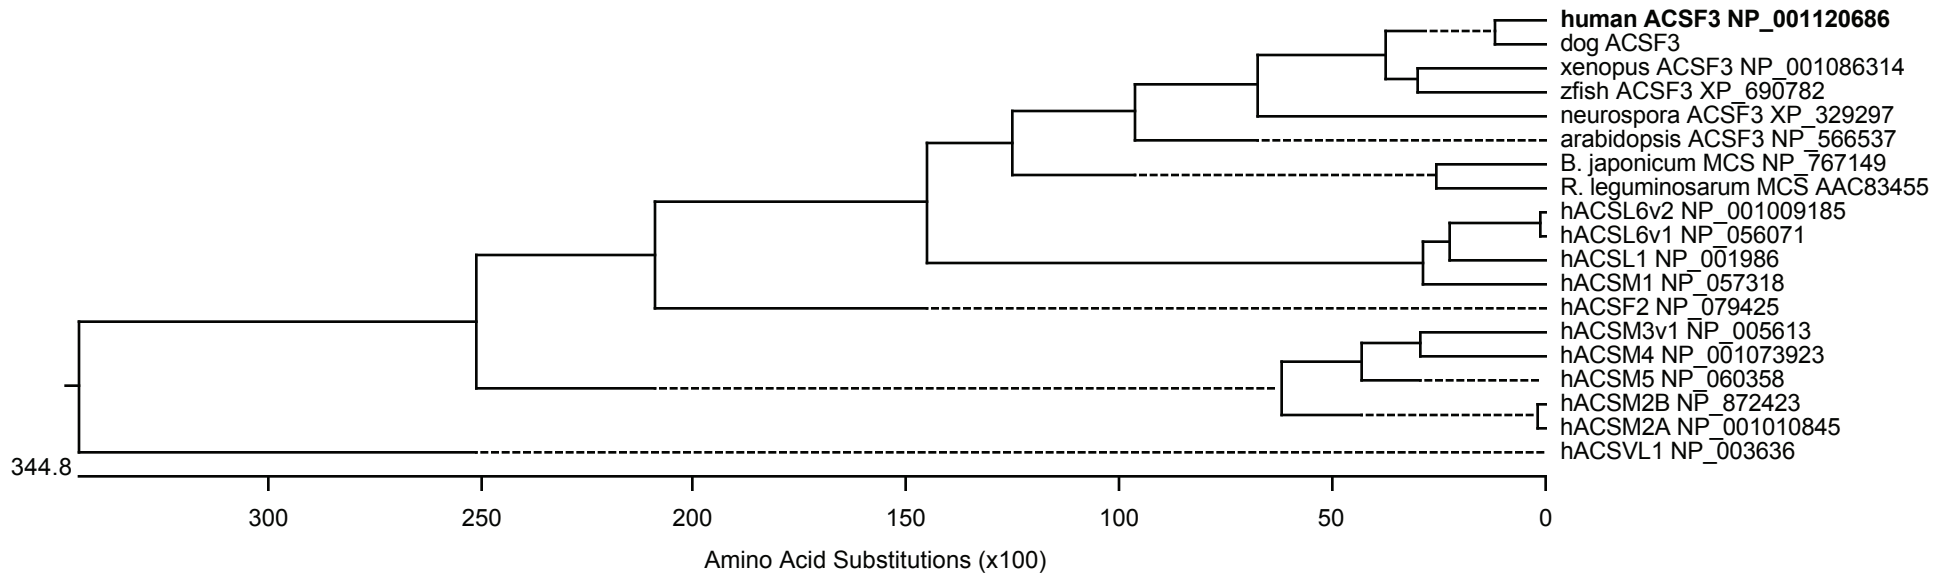

**Supplementary Figure 3. Phylogenetic tree of ACSF3 orthologues and ACS homologues.** The sequences indicated were aligned using the MegAlign program with the Clustal W method. Phylogenetic analysis shows that human ACSF3 is more similar to the bacterial MCS proteins than other ACS family members.

---

Input sequence length : 576 aa

---

VALUES OF COMPUTED PARAMETERS

Net charge of query sequence : +6  
Analysed region : 54  
Number of basic residues in targeting sequence : 8  
Number of acidic residues in targeting sequence : 1  
**Cleavage site** : **59**  
Cleaved sequence : MLPHVVLTFRRLGCALASCRLAPARHRGSGLLHTAPVARSDRSAPVFTALAFGDRIA

---

HYDROPHOBIC SCALE USED

|          | GES      | KD     | GVH1   | ECS   |
|----------|----------|--------|--------|-------|
| H17      | : 1.724  | 1.859  | 0.342  | 0.632 |
| MesoH    | : 0.107  | 0.585  | -0.240 | 0.330 |
| MuHd_075 | : 46.347 | 15.279 | 10.468 | 9.266 |
| MuHd_095 | : 27.113 | 17.480 | 5.482  | 6.854 |
| MuHd_100 | : 33.852 | 20.692 | 7.086  | 7.617 |
| MuHd_105 | : 38.851 | 22.565 | 8.176  | 8.850 |
| Hmax_075 | : 14.933 | 10.383 | 4.234  | 4.830 |
| Hmax_095 | : 12.162 | 19.337 | 3.218  | 6.423 |
| Hmax_100 | : 12.300 | 22.200 | 1.996  | 7.180 |
| Hmax_105 | : 14.100 | 19.250 | 1.949  | 4.240 |

---

PROBABILITY

of export to mitochondria: **0.9602**

**Supplementary Figure 4. Prediction of mitochondrial localization of ACSF3 by MitoProt II.** Human ACSF3 was analyzed by the MitoProt II program. The probability of ACSF3 being exported to mitochondria was 0.96 and the predicted mitochondrial leader sequence cleavage site was after the first 58 amino acids.

**Supplementary Table 1. Filtering criteria for whole exome sequence data from Subject 1.**

| <b>Filter</b>                                                                                         | <b>Number of variants</b> |
|-------------------------------------------------------------------------------------------------------|---------------------------|
| Initial variants                                                                                      | 114,467                   |
| Quality (MPG $\geq 10$ )                                                                              | 89,537                    |
| Compound heterozygous/homozygous                                                                      | 7,864                     |
| Nonsynonymous/nonsense/splice/frame shift                                                             | 1,376                     |
| Not in dbSNP                                                                                          | 301                       |
| Not homozygous in controls or MAF >10%                                                                | 134                       |
| Candidate genes with two variants (see below)                                                         | 12                        |
| <i>ACSF3, FAM63B, FAM154B, HLA-A*0226, LAMA2, LAMB4, LOC728138, MUC4, MUC17, OR10AD1, PLCH1, SBDS</i> |                           |

**Supplementary Table 2. Primers for ASCF3 Sequencing.**

| <b>Gene</b>  | <b>Exon</b>          | <b>Forward Primer 5'-3'</b> | <b>Reverse Primer 5'-3'</b> |
|--------------|----------------------|-----------------------------|-----------------------------|
| Human ACSF3  | Exon 3 (A)           | ACGTTTGGATGGGACAGTTG        | GGATGCTTCCTGTAGAGGGG        |
|              | Exon 3 (B)           | GCAGGCTCTGCGGGTGTGTC        | GACTCCACAGAAAAGCGAATG       |
|              | Exon 4               | AGGTCTGTGTGTGCTGTTGC        | GAAAGGCGCTTAGGCTGAGG        |
|              | Exon 5 (A)           | ATGAGAACGCTGTGCCTGGAG       | CTGCTTCCCAGAACTTAGTAGG      |
|              | Exon 5 (B)           | CTACCGAGTGCTTCCTTTCC        | GAAAGTGGGCTCTTTTCAC         |
|              | Exon 5 (C)           | GTTCTTAAGTTCTGAAACG         | TTTTCTTCACAAACTGCACG        |
|              | Exon 6 (A)           | GCTAAACCTGCCACCTTTGC        | TCGAGACTGGCCACCTTGG         |
|              | Exon 6 (B)           | CCTGCCTTTGGTTGTGCCGCGTAG    | GCAGCTGTGGGAAGTGCTC         |
|              | Exon 6 (C)           | AGTGCTGGAGAAGTGAAG          | CAGAGCCATGCCGATCTCG         |
|              | Exon 7               | TGTGTGCTTCTCTCCTCCAG        | GATGCACCAGTGTAAACCACC       |
|              | Exon 8               | TTTCAGAAAGCACCAATCCC        | CAATGAGTTCCTGCCTGTCC        |
|              | Exon 9               | AGACCCACATCATGGGCACAG       | TCTAAAAC TCAAACATGGAAGGC    |
|              | Exon 10              | GCCTGTAAGGGTCACTGAGG        | CGATGCCAATACCTAGGGTG        |
|              | Exon 11              | CTGAGTTCCTCCTGCTGGGC        | CCGTGGTTCTCGGTGTGAAG        |
| Canine ACSF3 | Exon 1 (A)           | CGGTGGAACAGGTCTGGTGG        | CGCAAGGACCACAGAGCTCC        |
|              | Exon 1 (B)           | GAGCGGAGGCATTGCTGTCC        | AGAACAGTGGCAGCTATGG         |
|              | Exon 2               | ATCTAAGCCCTGACCATGTCC       | CCACACCCCAACTTTCATGC        |
|              | Exon 3               | AGGGCTGTGCCTCTGCTCTTG       | TAAAGGGAGTGGAAATACACTGC     |
|              | Exon 4               | CGATACCCTGTTTGTTCATGAAC     | TTCTCTCCTGTCCCCGACTGG       |
|              | Exon 5               | CAGCCTCAGCCTCAAGCCTGG       | CTGCGTGTGCGCTATAGACG        |
|              | Exon 6               | AGTTCCAATGTTGAAAGATGC       | GGGCTCCTGACCATGATGAC        |
|              | Exon 7               | GGGTAGGGGACCTATGTTCC        | TGAAATACACATGGAAGCATG       |
|              | Exon 8               | GGGCTCCACCCAAAACACAGTG      | CTTCCCTGCAGCCTCAGGAATG      |
|              | Exon 9               | ACTTTACCTTACTGTAGACCG       | TATCTCTAGCGCTGAGGAGTGG      |
| Exon 10      | CCAGGCTGCCTGTCCCATGG | TCTTGCTTCTGTCTGGGTTAGG      |                             |

**Supplementary Table 3. Substrate specificity of N-terminal GST tagged ACSF3 purified from wheat germ extract.**

| <b>Substrates</b> | <b>Specific activity (nmol/min/mg protein)</b> | <b>Relative rate (% of malonate)</b> |
|-------------------|------------------------------------------------|--------------------------------------|
| Malonate          | 1334                                           | 100                                  |
| Methylmalonate    | 799                                            | 60                                   |
| Acetate           | Not detected                                   | 0                                    |
